# Supplementary material for: A high energy output and low onset temperature nanothermite based on three-dimensional ordered macroporous nano-NiFe2O4
Source: Royal Society of Chemistry journal article supplement (doi:10.1039/c6ra16429c), 2016-01-01
Supplement: c6ra16429c1.pdf [file c6ra16429c1.pdf]

## Supporting Information

# A high energy output and low onset temperature nanothermite based on three-dimensional ordered macroporous nano-NiFe<sub>2</sub>O<sub>4</sub>

Liming Shi,<sup>a</sup> Wenchao Zhang,<sup>\*a</sup> Jia Cheng,<sup>a</sup> Chunpei Yu,<sup>a</sup> Ruiqi Shen,<sup>a</sup> Jiahai Ye,<sup>a</sup> Zhichun Qin<sup>a</sup> and Yimin Chao<sup>\*b</sup>

<sup>a</sup> School of Chemical Engineering, Nanjing University of Science and Technology, Nanjing 210094, China

<sup>b</sup> School of Chemistry, University of East Anglia, Norwich NR4 7TJ, UK

\*Corresponding authors:

zhangwenchao303@aliyun.com

Y.Chao@uea.ac.uk

### Part one: Energy-dispersive X-ray spectroscopy (EDX) analysis:

Table S1. Element content distribution of Al/NiFe<sub>2</sub>O<sub>4</sub> membrane after 15 min Al deposition.

| Element         | O     | Al   | Si    | Fe   | Ni   | Au    |
|-----------------|-------|------|-------|------|------|-------|
| Weight ratio(%) | 37.47 | 7.71 | 27.51 | 4.48 | 2.07 | 20.76 |
| atomic ratio(%) | 56.14 | 6.85 | 31.71 | 1.92 | 0.85 | 2.53  |

atomic ratio, Al: Fe: Ni= 6.85: 1.92: 0.85

### Part two: The pattern of DSC curve

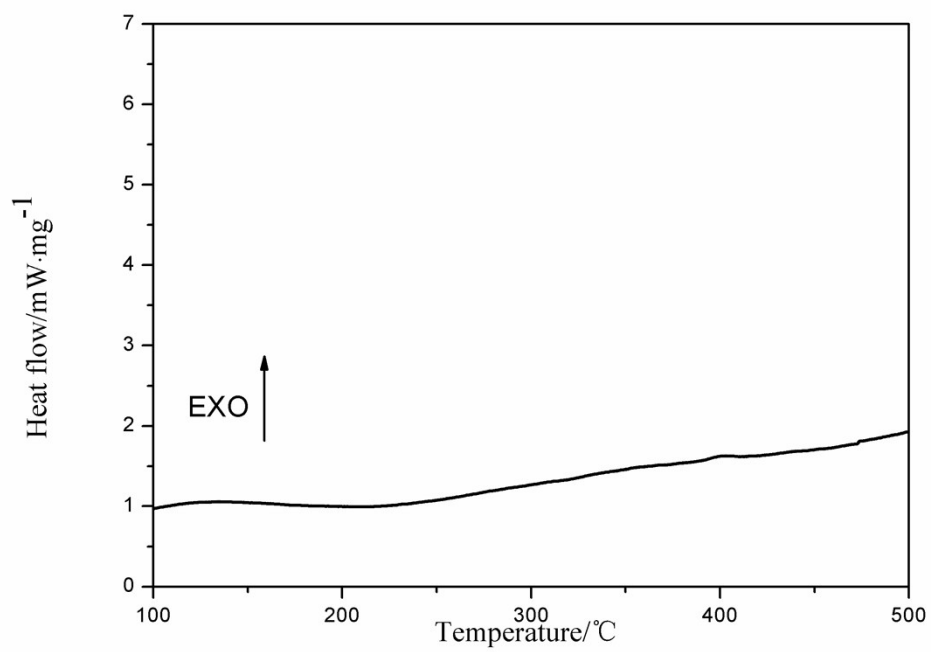

Fig. S1. DSC curve of NiFe<sub>2</sub>O<sub>4</sub> membrane
